# Supplementary material for: Introgressing Subgenome Components from Brassica rapa and B. carinata to B. juncea for Broadening Its Genetic Base and Exploring Intersubgenomic Heterosis
Source: PubMed Central journal article supplement (PMC5112257; doi:10.3389/fpls.2016.01677), 2016-11-17
Supplement: Image2.pdf [file Image2.pdf]

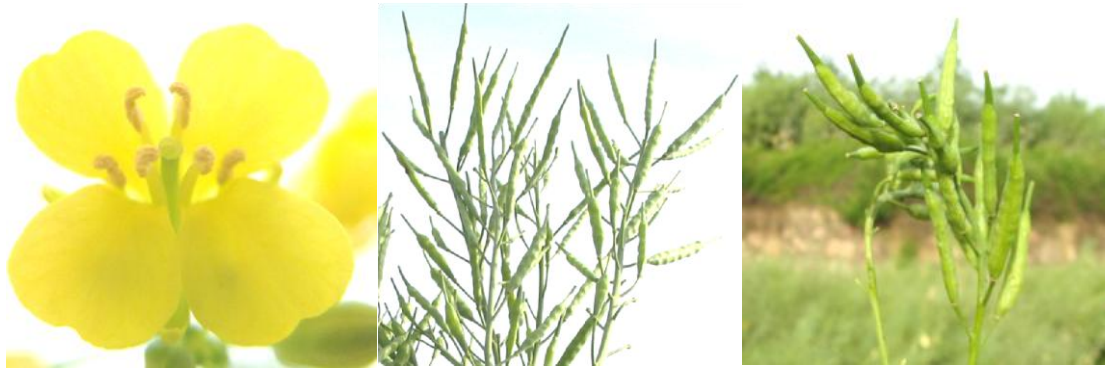

**Supplementary Fig. 2.** The reproductive organs exhibiting good fertility at the F<sub>3</sub> generation. The three pictures in the left, middle and right shows a flower with abundant pollen at blooming (left), developing siliques after self-pollination (middle) and cross-pollinated with pollen from traditional *B. juncea* (right), respectively.
